1                   **Independent control of mean and noise by convolution of gene expression**  
2                                                       **distributions**

3 Karl P. Gerhardt<sup>1</sup>, Satyajit D. Rao<sup>1</sup>, Evan J. Olson<sup>1</sup>, Oleg A. Igoshin<sup>1,2,3,4</sup>, Jeffrey J.  
4 Tabor<sup>1,2\*</sup>.

5  
6 <sup>1</sup>Department of Bioengineering, <sup>2</sup>Department of Biosciences, <sup>3</sup>Center for Theoretical  
7 Biophysics, <sup>4</sup>Department of Chemistry, Rice University, 6100 Main Street, Houston,  
8 Texas, 77005, USA

9 \*Contact: [jeff.tabor@rice.edu](mailto:jeff.tabor@rice.edu)

10

11 **Abstract**

12 Gene expression noise can reduce cellular fitness or facilitate processes such as  
13 alternative metabolism, antibiotic resistance, and differentiation. Unfortunately, efforts to  
14 study the impacts of noise have been hampered by a scaling relationship between noise  
15 and expression level from a single promoter. Here, we use theory to demonstrate that  
16 mean and noise can be controlled independently by expressing two copies of a gene from  
17 separate inducible promoters in the same cell. We engineer low and high noise inducible  
18 promoters to validate this result in *Escherichia coli*, and develop a model that predicts the  
19 experimental distributions. Finally, we use our method to reveal that the response of a  
20 promoter to a repressor is less sensitive with higher repressor noise and explain this result  
21 using a law from probability theory. Our approach can be applied to investigate the effects

22 of noise on diverse biological pathways or program cellular heterogeneity for synthetic  
23 biology applications.

24

## 25 **Introduction**

26 Protein copy numbers vary within populations of genetically identical cells due to  
27 stochasticity in the molecular and cellular level events that impact gene expression<sup>1-3</sup>.

28 This gene expression noise can be harmful, causing metabolic or physiological  
29 challenges, or reduce the reliability with which a cell can carry out a task<sup>4-7</sup>. Indeed,

30 evolution appears to have optimized genomic locus<sup>8</sup>, promoter architecture and  
31 sequence<sup>9</sup>, transcription and translation rate<sup>10</sup>, and selected for negative feedback<sup>11,12</sup> to

32 decrease noise in the expression of toxic, complex forming, highly-connected, and  
33 essential proteins<sup>8,10,13-16</sup>. On the other hand, evolution has also exploited noise as a

34 means to regulate stress response<sup>17-19</sup>, alternative metabolism<sup>20</sup>, cell-fate  
35 determination<sup>21</sup>, and pathways enabling cell populations to divide labor or hedge bets

36 against unpredictable environments<sup>22,23</sup>.

37

38 Gene expression noise can be considered to contain an intrinsic component, relating to

39 stochasticity in the chemical reactions of gene expression processes, and an extrinsic  
40 component, relating to noise in global conditions or upstream factors<sup>1,24,25</sup>. At low

41 numbers of expressed proteins, intrinsic noise dominates and inversely correlates with  
42 the mean. At higher protein copy numbers, extrinsic noise becomes dominant and

43 uncorrelated with the mean.

44 Tools that specifically modulate noise in the expression of genes of interest are needed  
45 to study the impact of noise on biological processes. However, controlling noise  
46 independently of mean is a major challenge due to the coupling between these two  
47 parameters<sup>9,13,14,26–28</sup>.

48

49 Several strategies for decoupling mean and noise have been reported. For example,  
50 researchers have altered promoter activation kinetics<sup>9,29,30</sup>, operator site location and  
51 multiplicity<sup>31,32</sup>, and introduced transcriptional feedback<sup>33–35</sup>. However, multiple strains  
52 must be engineered to achieve different noise levels for the same mean using these  
53 methods. Independent control of mean and noise in a single strain requires manipulation  
54 of two separate processes impacting protein copy number<sup>36</sup>. This result has been  
55 demonstrated by combining two small-molecule responsive regulators in a cascade<sup>37–40</sup>,  
56 altering both the frequency and bias of promoter state switching<sup>41</sup>, tuning both  
57 transcription and mRNA degradation rates<sup>42</sup>, or using a time-varying input to  
58 independently control promoter activation frequency and transcription rate<sup>43</sup>.

59

60 One important limitation to all of these previous approaches is that they rely upon genetic  
61 parts, circuits, or pathways that are native to or have been optimized to function in a  
62 particular organism. As a result, substantial re-engineering may be required to achieve  
63 the same results in each new organism of interest. Additionally, there may be fundamental  
64 limitations on the levels of gene expression and noise that can be achieved using these  
65 approaches. For example, a two-step cascade primarily allows control of extrinsic noise  
66 as it relies on transmission of noise from the upstream regulator to the output<sup>39,40</sup>.

67 Likewise, modulation of promoter kinetics is expected to primarily modulate intrinsic  
68 noise<sup>39</sup> and is unlikely to be effective at high copy numbers.

69

70 Here, we show that combining the protein expression distributions from multiple  
71 promoters in a single cell is a generalizable and straightforward strategy to achieve robust  
72 and independent control of mean and noise over a wide area. To this end, we first use a  
73 simple theoretical model to reveal that the mean and noise of a population distribution  
74 can be independently controlled using two co-expressed and orthogonally-regulated  
75 inducible promoters (IPs). We then implement this approach experimentally by  
76 constructing low and high noise generating IPs activated by the addition of two separate  
77 inducer molecules in *E. coli*. Next, we show that mean and noise of total gene expression  
78 can be manipulated using inducer combinations to control the activity of each IP. We  
79 characterize the steady-state behavior of cells harboring the IP pair and present a simple  
80 mathematical model to predict mean and noise from inducer concentrations. Next, we  
81 show that our experimental gene expression profiles can be predicted with high accuracy  
82 by simulating convolutions between the distributions contributed by each IP. Finally, we  
83 use our approach to independently tune mean and noise in the expression of a bacterial  
84 transcriptional repressor and analyze how each affects the activity of a target promoter  
85 independently.

86

## 87 **Results**

### 88 **Model for independent control of mean and noise from two IPs**

89 We considered two copies of a gene, encoding products  $G_1$  and  $G_2$ , in a single cell. Here,  
90 the total amount of gene product,  $G$ , is  $G_1 + G_2$ . The mean ( $\mu$ ) value of  $G$  across a  
91 population of such cells is obtained from

92

$$93 \quad \mu(G) = \mu(G_1) + \mu(G_2) \quad (1)$$

94

95 and the variance ( $\sigma^2$ ) from

96

$$97 \quad \sigma(G)^2 = \sigma(G_1)^2 + \sigma(G_2)^2 + 2Cov(G_1, G_2) \quad (2)$$

98

99 where  $Cov$  is the covariance. If  $G_1$  and  $G_2$  are regulated such that their expression is  
100 stochastically independent and the covariation negligible, the noise ( $\eta$ , defined as the  
101 standard deviation ( $\sigma$ ) divided by the mean) of  $G$  is described by a weighted average of  
102 the noise from each source

103

$$104 \quad \eta(G) = \left( \frac{\eta(G_1)^2 \mu(G_1)^2 + \eta(G_2)^2 \mu(G_2)^2}{(\mu(G_1) + \mu(G_2))^2} \right)^{\frac{1}{2}} \quad (3)$$

105

106 and the distribution of  $G$  in the cell population is described by a convolution

107

$$108 \quad p_G(g) = \int_{-\infty}^{\infty} p_2(g - g_1) p_1(g_1) dg_1 \quad (4)$$

109

110 where  $p_1$ ,  $p_2$ , and  $p_G$  are the probability density functions of  $G_1$ ,  $G_2$ , and  $G$ , respectively.  
111 Conditions for stochastically independent  $G_1$  and  $G_2$  expression can be met if their  
112 dominant sources of noise are intrinsic or pathway specific<sup>25</sup>.

113

114 Based on these results, we reasoned that mean and noise of  $G$  could be independently  
115 controlled by regulating  $G_1$  and  $G_2$  expression from low and high noise IPs (Fig. 1a). In  
116 this approach,  $\eta(G)$  can be varied between  $\eta(G_1)$  and  $\eta(G_2)$  while maintaining constant  
117  $\mu(G)$  by tuning the relative expression of  $G_1$  and  $G_2$  with ratios of IP inputs (Fig. 1b).  $\eta(G)$   
118 can be tuned this way at different values of  $\mu(G)$  by controlling the absolute expression  
119 of  $G_1$  and  $G_2$  with the amount of IP inputs. We also reasoned that the distribution of  $G$  can  
120 be predicted from a convolution of the distributions of  $G_1$  and  $G_2$  (Fig 1c). One attractive  
121 feature of this approach is the direct relationship between tunability and the difference in  
122 noise produced by  $G_1$  and  $G_2$ . Therefore, IPs that produce large differences in noise over  
123 the same range of means are desirable when implementing this method.

124

### 125 **Engineering a high noise promoter induced by AHL**

126 To engineer a system capable of tuning noise over a wide range, we designed two IPs  
127 that produce similar mean expression levels with very different noise values. First, we  
128 engineered a high noise IP that incorporates positive autoregulation through the 3-oxo-  
129 C<sub>6</sub>-acylhomoserine lactone (AHL)-dependent transcriptional activator LuxR and its target  
130 promoter P<sub>lux</sub>. Specifically, we expressed a bicistronic mRNA encoding the reporter gene  
131 superfolder green fluorescent protein (*sfgfp*) and *luxR* as the output of P<sub>lux</sub>. To achieve  
132 high noise levels and strong inducibility, we generated a small library of variants of this IP

133 with *luxR* ribosome binding sites (RBSs) of different strengths (Fig. 2a, Supplementary  
134 Fig. 1). Initially, we expected that stronger *luxR* RBSs would increase positive feedback  
135 strength by increasing the translational burst size of *luxR*. We believed that this effect  
136 would result in more *luxR* expression per AHL molecule, a steeper AHL-mean transfer  
137 function, and higher noise at intermediate IP outputs<sup>44–46</sup>. To examine the performance  
138 of these high noise IP designs, we separately transformed each construct into bacteria,  
139 treated the resulting strains with different AHL concentrations, and measured the resulting  
140 sfGFP fluorescence distributions via flow cytometry. To our surprise, weaker *luxR* RBSs  
141 result in increased steepness in the AHL-mean transfer function and higher noise in the  
142 AHL-noise and mean-noise transfer functions, respectively (Fig. 2b-d, Supplementary  
143 Fig. 1).

144  
145 To understand these effects, we developed a deterministic kinetic model of the high noise  
146 IP family (Supplementary Methods, Supplementary Table 2). This model details the  
147 binding interaction between LuxR and AHL, as well as positive transcriptional  
148 autoregulation by LuxR:AHL. While such a deterministic model cannot predict gene  
149 expression noise, it allows us to analytically solve the steady-state response of the high  
150 noise IP family to AHL and identify design principles responsible for steepness of the  
151 transfer function. In particular, we find that this family of high noise IP designs is only  
152 sensitive to feedback when LuxR:AHL concentration is sensitive to LuxR fluctuations, i.e.,  
153 when LuxR is limiting relative to AHL. At low *luxR* translation rates and intermediate AHL  
154 concentrations, the sfGFP output is bistable and exhibits hysteresis. Cell populations

155 undergo abrupt jumps from low to high states in this regime, resulting in steep AHL-mean  
156 transfer functions (Supplementary Fig. 2).

157

158 Within this bistable window, we expected noise-driven transitions between states to result  
159 in high gene expression variability. To verify this prediction, we constructed a stochastic  
160 kinetic model of the positive feedback circuit and computed AHL-mean and AHL-noise  
161 transfer functions using Gillespie SSA simulations (Supplementary Methods,  
162 Supplementary Tables 3 and 4). Mean and noise values quantitatively match  
163 experimental values for all four RBSs (Supplementary Fig. 3). For weak RBSs, noise  
164 reaches a maximum at intermediate AHL concentrations, while stronger RBSs show  
165 monotonic decreases in noise, further demonstrating ultrasensitive circuit transitions due  
166 to bistability.

167

168 Taken together, these kinetic modeling results capture the performance of our high noise  
169 IP family and recapitulate the unexpected inverse relationship between *luxR* RBS  
170 strength and the magnitude of feedback in the circuit. Among the high noise IP variants  
171 we tested, the variant containing the B0031 RBS generated the highest overall noise  
172 while maintaining unimodality. With this variant (hereafter named IP<sub>h</sub>), we have  
173 constructed a high noise IP that satisfies our design criteria.

174

### 175 **Engineering a low noise promoter induced by aTc**

176 To produce low noise gene expression distributions over a wide range of mean values,  
177 we designed an IP wherein *sfGFP* is expressed under control of the Tetracycline Repressor



178 (TetR)-regulated  $P_{\text{Ltet-O1}}$  promoter, with *tetR* expressed from a constitutive promoter on  
179 the same plasmid (Fig. 2e). We cloned the DNA encoding this IP into different plasmid  
180 backbones with ColE1 (50-70 copies/cell), p15a (20-30 copies/cell), and SC101\* (3-4  
181 copies/cell)<sup>47</sup> origins of replication (Fig. 2e). Initially, we hoped to find differences in output  
182 noise between origin of replication variants by virtue of the scaling between copy number  
183 and intrinsic noise, or by differences in plasmid copy number variability<sup>25,47,48</sup>. Mean  
184 output range (the difference between high and low states), detection threshold (inducer  
185 concentration at half output range), and steepness all increased with plasmid copy  
186 number (Fig. 2f, Supplementary Table 5). A deterministic kinetic model of the low noise  
187 IPs (Supplementary Table 6, Supplementary Methods) capture these experimental  
188 behaviors (Supplementary Fig. 4) and provides an explanation for why their transfer  
189 functions become steeper with increasing plasmid copy number.

190

191 For all origin of replication variants, we also observed that the sfGFP noise decreases  
192 monotonically as a function of both inducer and sfGFP mean until reaching a noise floor  
193 of about 0.25 (Fig 2g, h). At low induction, higher copy number variants produce lower  
194 noise but also correspondingly higher sfGFP mean, such that all variants collapse onto a  
195 similar initial trajectory. These behaviors suggest noise from this IP is dominated by  
196 intrinsic (at low to intermediate expression) and global extrinsic (at high expression)  
197 sources rather than transmitted noise from TetR or differences in copy number stringency  
198 between origins of replication. At intermediate induction, mean-noise transfer functions  
199 diverge slightly, with lower copy number variants decreasing more rapidly than higher  
200 copy number variants (Fig. 2h). A stochastic kinetic model of this low noise IP

201 (Supplementary Methods) recapitulates these experimental results, predicting monotonic  
202 decreases in noise as a function of aTc for all origin of replication variants, and lower  
203 noise at intermediate induction for lower copy number variants (Supplementary Fig. 3,  
204 Supplementary Tables 7-9).

205

206 These kinetic models recapitulate the behavior of our low noise IPs and reveal that the  
207 observed performance differences that arise on different plasmid backbones are  
208 attributable to differences in repressor and promoter copy number. The SC101\* variant  
209 generates the lowest overall noise and similar sfGFP mean output levels as IP<sub>h</sub>. Thus,  
210 we renamed this variant IP<sub>l</sub> and carried it forward for further studies.

211

## 212 **Independent control of mean and noise with low and high noise IPs**

213 To demonstrate independent control of mean and noise by summing gene expression  
214 from low and high noise IPs, we co-transformed bacteria with plasmids encoding IP<sub>h</sub> and  
215 IP<sub>l</sub> (Fig. 3a). We exposed populations of the co-transformed bacteria to a 25 x 25 (625  
216 total) panel of AHL and aTc concentrations and measured the sfGFP distributions by flow  
217 cytometry (Fig. 3b-d). We found that AHL-mean transfer functions are sigmoidal and shift  
218 higher with the level of aTc (Fig. 3b). This behavior is consistent with summation of sfGFP  
219 from IP<sub>h</sub> and IP<sub>l</sub>. Both the AHL-noise and mean-noise transfer functions decrease non-  
220 monotonically, peak at intermediate AHL concentrations, and shift lower with the level of  
221 aTc (Fig. 3c,d). These properties are consistent with noise being determined by the  
222 relative contribution of IP<sub>l</sub> and IP<sub>h</sub> to total sfGFP (Eq. 3). As intended, exposure to different  
223 inducer combinations produces an area in mean-noise space over which our system can

224 be tuned (Fig. 3d). Thus, we can independently control mean and noise by summing gene  
225 expression from low and high noise IPs.

226

227 As predicted by our model, a wide range of sfGFP noise values can be achieved at  
228 virtually the same mean (Fig. 3d-g). At low total bacterial fluorescence levels, differences  
229 between distributions with similar mean and disparate noise are masked by *E. coli*  
230 autofluorescence (Fig. 3f). However, as sfGFP levels increase and the contribution of  
231 autofluorescence to total cellular fluorescence becomes negligible, differences between  
232 distributions with similar mean and different noise levels become dramatic (Fig. 3e,f).  
233 Thus, while we can tune mean and noise at low and high expression levels, detecting  
234 tunability at low mean requires analysis after autofluorescence subtraction.

235

236 We next determined whether Eqs (1) and (3) could quantitatively recapitulate the behavior  
237 of this system. To that end, we adopted two phenomenological equations to describe  
238 mean and noise of each IP as a function of inducer, and fit their parameters to the  
239 experimental mean-noise data in Figure 3 (Supplementary Methods). Following this  
240 approach, we observe close agreement between model predictions and experimental  
241 data, enabling accurate prediction of mean and noise from inducer concentrations and  
242 further supporting the hypothesis of additive gene expression from our two IPs. (Fig. 3b-  
243 d, Supplementary Fig. 5, Supplementary Table 10).

244

245 **IP<sub>h</sub>/IP<sub>l</sub> outperforms previous mean-noise control systems**

246 To our knowledge, no metric has been proposed to describe the ability of a genetically-  
247 encoded system to independently tune gene expression mean and noise. The dynamic  
248 range, or ratio of output gene expression levels in the fully active versus fully inactive  
249 states, is a 1-dimensional metric frequently used to quantify IP performance. However,  
250 mean and noise are tunable over a 2-dimensional area<sup>37–39,41–43</sup>.

251  
252 To quantify the performance of mean-noise control systems, we developed metrics that  
253 we term dynamic area ( $F_A$ ) and dynamic noise ( $F_\eta$ ) (Methods).  $F_A$  measures the fold-  
254 change in mean-noise area over which a system can be tuned, while  $F_\eta$  measures the  
255 largest fold-change in noise a system can achieve at a constant mean. Practically,  $F_A$   
256 describes the capacity of a system to produce different combinations of both mean and  
257 noise, while  $F_\eta$  captures the ability to modulate noise at a constant mean. We computed  
258  $F_A$  and  $F_\eta$  using the experimental mean-noise dataset measured for our system and found  
259 values of 11.39 and 6.9, respectively (Fig. 3g). By this same analysis, we find that our  
260 system performs better than any previously described mean-noise control system (which  
261 range from 2.22 to 10.17 in  $F_A$  and 1.61 to 4.66 in  $F_\eta$ ) we are aware of, in any organism  
262 (Supplementary Fig. 6, Supplementary Table 11).

263  
264 Noise values among native *E. coli* genes range from 0.26 to 6.09 in a manner strongly  
265 dependent on the mean<sup>13</sup>. By comparison, our system can achieve noise values ranging  
266 from 0.318 to 2.18 at just a single mean (1045 MEFL, where  $F_\eta$  is defined), making our  
267 system capable of tuning noise through a range which is physiologically relevant to *E.*  
268 *coli*.

269

## 270 **Convolution model predicts $IP_h/IP_l$ distributions**

271 We hypothesized that the distributions produced by our combined  $IP_h/IP_l$  system could be  
272 predicted by simulating a convolution between distributions generated by  $IP_l$  and  $IP_h$   
273 individually (Fig. 4a). To examine this hypothesis, we simulated each of the 625  
274 experimental populations resulting from exposure to the AHL and aTc panel in Figure 3  
275 by summing randomly sampled fluorescence events between populations induced with  
276 only AHL and populations induced with only aTc (termed marginal distributions) (Fig. 4b,  
277 Methods). These simulated distributions show remarkable similarity to their experimental  
278 counterparts and frequently capture subtle, higher-order behaviors observed in  
279 experimental distributions such as skew and bimodality (Fig. 4b). While the simulated  
280 distributions are highly accurate overall, fluorescence levels are systematically  
281 overestimated in distributions with very low mean. This overestimation occurs because  
282 autofluorescence and basal sfGFP fluorescence (sfGFP fluorescence in the absence of  
283 inducer) are measured twice during the summation of two cell fluorescence events (Fig.  
284 4a). Our distribution predictions are also less accurate when the AHL-induced population  
285 is near the inflection point of the AHL-mean transfer function (Fig. 3b).

286

287 We quantified similarity between each pair of experimental and predicted distributions  
288 using the Bhattacharyya coefficient<sup>49</sup> ( $c_B$ ), a metric ranging from 0 to 1 measuring overlap  
289 between two probability distributions (Fig. 4b,c, Methods). The average  $c_B$  for all  
290 populations is remarkably high, at 0.92 with a standard deviation of 0.094. However, due  
291 to the previously-described effect of overestimating autofluorescence and basal sfGFP

292 expression,  $c_B$  shows strong correlation with expression mean below about 1,000 MEFL  
293 (Supplementary Fig. 7). Mean and standard deviation of simulated distributions show  
294 strong concordance with their experimental counterparts ( $\rho_c$  of 0.969 and 0.990  
295 respectively) and this concordance is further improved ( $\rho_c$  of 0.995 and 0.993  
296 respectively) after compensation for overestimated autofluorescence and basal  
297 expression (Fig. 4d,e, Methods). Overall, this approach of simulating convolutions  
298 between two experimental marginal distributions enables simple and accurate prediction  
299 of the total fluorescence distributions generated by our system.

300

### 301 **Repressor noise decreases steepness of promoter response**

302 The transcription factor-promoter transfer function is the quantitative relationship between  
303 transcription factor expression level and target promoter activity. It has previously been  
304 shown that the shape, including the steepness, of a transcription factor-promoter transfer  
305 function can strongly depend on the levels and context of transcription factor  
306 expression<sup>50–54</sup>. Based on previous experiments measuring the impact of noise on  
307 biological processes<sup>29,37,43</sup>, we hypothesized that increasing noise in transcription factor  
308 expression would produce less steep transcription factor-promoter transfer functions. We  
309 used  $IP_h/IP_l$  to characterize the effect of repressor noise on mean expression from a target  
310 promoter. To that end, we first fused  $PhIF^{AM}$ <sup>50</sup>, a TetR family repressor from  
311 *Pseudomonas fluorescens*, to the C-terminus of sfGFP on both  $IP_h$  and  $IP_l$ . We then co-  
312 transformed *E. coli* with plasmids expressing the modified  $IP_h$  and  $IP_l$  along with an output  
313 plasmid carrying *mCherry* expressed under the  $PhIF^{AM}$  repressed  $P_{PhIF}$  promoter (Fig.  
314 5a). We grew these bacteria under different combinations of AHL and aTc, allowed sfGFP

315 and mCherry levels to reach steady-state, and quantified both fluorescent proteins by flow  
316 cytometry (Fig. 5b,c, Supplementary Figs. 8-10). As before, mean-noise transfer functions  
317 decrease non-monotonically with respect to AHL induction, peak at intermediate AHL  
318 concentrations, and shift lower upon addition of aTc (Fig. 5b). Conversely, induction with  
319 only aTc results in comparatively low noise, which monotonically decreases with higher  
320 mean (Fig. 5b). As a result, the system achieves different sfGFP-PhIF<sup>AM</sup> noise while  
321 maintaining the same mean by applying different amounts and ratios of AHL and aTc.  
322 Mean mCherry fluorescence decreases in response to mean sfGFP-PhIF<sup>AM</sup> in a manner  
323 that strongly depends on noise (Fig. 5c, Supplementary Fig. 10). When induced with AHL,  
324 mean mCherry begins to decrease at lower mean sfGFP-PhIF<sup>AM</sup>, but requires  
325 dramatically higher mean sfGFP-PhIF<sup>AM</sup> to become fully repressed compared to when  
326 induced with aTc (Fig. 5c, Supplementary Fig. 10). Moreover, induction with combinations  
327 of AHL and aTc generates intermediate levels of this effect. Noise, therefore, makes the  
328 PhIF-promoter transfer function overall less steep, increases apparent PhIF<sup>AM</sup> activity at  
329 low mean, and decreases apparent PhIF<sup>AM</sup> activity at high mean. This striking result  
330 demonstrates how a single transcription factor can generate vastly different population  
331 level behaviors depending on the details of its expression.

332

333 We applied a simple law from probability theory (Methods) to predict mean mCherry  
334 values from probability distributions of sfGFP-PhIF<sup>AM</sup> (Supplementary Methods,  
335 Supplementary Fig. 11, Supplementary Table 12). While predicted mean mCherry values  
336 show a qualitative agreement with the data (Fig. 5d), strong cell autofluorescence signal

337 in the fluorescence distributions at low expression levels likely undermines a more  
338 quantitative agreement.

339

## 340 **Discussion**

341 In nature, gene duplication has been proposed as a mechanism to resolve a tradeoff  
342 between expression noise and environmental responsiveness<sup>55</sup>. This hypothesis was  
343 recently validated for a pair of duplicated transcription factors in *S. cerevisiae*, where one  
344 member of the pair exhibits low noise and is constitutively expressed, while the other  
345 exhibits high noise and is induced by environmental stress<sup>56</sup>. This strategy appears to  
346 have evolved to minimize transcription factor noise under normal growth conditions while  
347 also allowing activation of a stress response pathway under stress-inducing conditions.  
348 Based on the results of this study, we hypothesize that gene duplication may also allow  
349 cells to adjust gene expression noise in order to increase fitness in environments where  
350 low noise is beneficial and in other environments where high noise is beneficial.

351

352 Unlike previous approaches to modulating mean and noise in gene expression, our  
353 method does not require the use of a particular genetic part or circuit, a specific  
354 mechanism of noise reduction or amplification, or a particular host organism. Rather, it  
355 only requires the availability of orthogonal low and high noise generating IPs in an  
356 organism of interest and the ability to co-transform them into a single cell.

357

358 Though several mean-noise control systems have been reported, there had been no  
359 method available to benchmark their performance against one another. Here, we propose



360 dynamic area and dynamic noise to quantify the performance of mean-noise control  
361 systems. These metrics capture the magnitude of the mean-noise area and the noise  
362 accessible at a constant mean, respectively. Like dynamic range, these metrics are  
363 independent of the absolute values of mean and noise. By comparing these two variables,  
364 one could distinguish systems that are tunable in both dimensions from systems that are  
365 primarily tunable in just a single dimension.

366

367 Our model based on summation of gene expression from two IPs accurately predicts  
368 population-level mean and noise of fluorescence distributions from inducer  
369 concentrations. The success of this approach supports the hypothesis for additive gene  
370 expression from our two engineered sources and may be adapted to describe future  
371 implementations of this method.

372

373 We can predict total gene expression distributions by simulating convolutions between  
374 experimental  $IP_l$  and  $IP_h$  distributions. While the predictions are systematically  
375 overestimated when autofluorescence and basal reporter gene fluorescence dominate  
376 (at low mean), they are otherwise surprisingly accurate and able to capture detailed  
377 population features that would not be predicted following a parametric approach. Going  
378 forward, our predictions would benefit from a method to reduce or deconvolve  
379 autofluorescence from flow cytometry measurements. While convolution predictions  
380 require advance measurement of marginal distributions, the number of convolutions that  
381 can be predicted combinatorially increases with number of marginal distributions  
382 measured. We imagine this predictive ability could be utilized to forward engineer desired

383 convolution distributions, including their higher moments and noise types, from existing  
384 promoter libraries<sup>57–63</sup>, constitutive or otherwise. Likewise, our method could be used to  
385 combinatorially increase the number of gene expression distributions achievable with a  
386 constitutive promoter library by expressing the same gene from combinations of two or  
387 more library members.

388

389 Our results indicate that regulated promoters respond to their cognate transcription  
390 factors at lower mean expression levels but require higher mean expression levels to  
391 saturate as transcription factor noise increases. As a result, a noisy transcription factor  
392 has higher apparent activity than a less noisy transcription factor at low expression levels,  
393 while the opposite is true at high levels. These findings could be used to anticipate the  
394 effect of changing the distribution of a transcriptional regulator or create design principles  
395 for predicting and programming the shape of transcriptional dose-response curves.

396

397 Our method could be used to study other noise-dependent biological phenomena such  
398 as transient stochastic resistance<sup>19,64</sup>, persister cell formation<sup>17,18</sup>, stochastic  
399 differentiation<sup>21</sup>, noise-induced cooperative behaviors<sup>22,23</sup>, or gene circuit stability<sup>65</sup> in cell  
400 populations. Such studies could provide a greater experimental basis for the fitness  
401 advantages conferred by noise or be used to create design principles for engineering  
402 desirable cell population behaviors using noise-driven processes.

403

404 Gene expression convolution could also be used to engineer noisy phenotypes into  
405 populations of living cells. Example behaviors include genetically identical populations

406 that automatically differentiate into specified ratios of cell sub-types<sup>66</sup>, form Turing-type  
407 patterns using activator and inhibitor morphogens with similar diffusion rates<sup>67</sup>, or  
408 stochastically lyse in order to release enzymes to enable the population to metabolize  
409 complex agricultural feedstocks<sup>68</sup>. Taken together, gene expression convolution is a  
410 simple strategy for studying and controlling gene expression noise in a wide range of  
411 organisms and biological pathways.

412

## 413 **Methods**

### 414 **Molecular biology**

415 The plasmids used in this study are listed in Supplementary Table 13. Plasmid maps are  
416 shown in Supplementary Fig. 12. DNA assembly was performed by the Golden Gate  
417 method<sup>69</sup>, and cloning was performed in strain NEB 10 $\beta$  (New England Biolabs). A PhIF  
418 mutant (PhIF<sup>AM</sup>) with improved repression activity was amplified from the genome of strain  
419 sAJM.1506<sup>50</sup> and used in this study.

420

### 421 **Cell growth and chemical induction**

#### 422 *IP characterization and convolution experiments*

423 Experiments were performed in strain MG1655 in M9 media + 100 mM HEPES (pH 6.6)  
424 at 37°C and 250 RPM of shaking. Media was supplemented with ampicillin (50  $\mu$ g/mL),  
425 spectinomycin (100  $\mu$ g/mL), and chloramphenicol (35  $\mu$ g/mL) as appropriate to maintain  
426 plasmids.

427

428 Frozen preculture aliquots of each experimental strain were generated by growing  
429 transformants to exponential phase ( $OD_{600} \approx 0.1$ ), adding glycerol to 18% (v/v), recording  
430  $OD_{600}$ , and freezing 100  $\mu$ L aliquots in PCR tubes at  $-80^{\circ}\text{C}$ .

431

432 Panels of chemical inducer concentrations were prepared by diluting varying amounts of  
433 AHL (Sigma-Aldrich, K3007) in media, and aTc (Takara, 63130) in 100% ethanol, in wells  
434 of 96-well plates. Inducer concentrations in each panel well were prepared to 200X the  
435 desired final concentration. Panel plates were sealed with adhesive foil, stored at  $-30^{\circ}\text{C}$ ,  
436 and warmed to room temperature before experiments.

437

438 Experimental cultures were prepared by diluting a volume of preculture in media to  
439 achieve a cell density of  $OD_{600} = 2 \times 10^{-5}$ . Culture media was distributed among wells of  
440 24-well plates (1 mL/well) and supplemented with the desired chemical inducer  
441 concentration by multichannel pipetting solution from chemical inducer panels. Culture  
442 plates were then sealed with adhesive foil and grown for 6 h to  $OD_{600} \leq 0.3$ , after which  
443 time they were iced for  $\geq 15$  min and measured by flow cytometry.

444

#### 445 *Transcription factor noise experiments*

446 Experiments were performed as described above but in LB media. LB media was found  
447 to be necessary due to high metabolic burden from mCherry expression.

448

#### 449 **Flow cytometry**

450 Flow Cytometry was performed with a BD FACScan flow cytometer outfitted with blue  
451 (488 nm, 30 mW) and yellow (561 nm, 50 mW) solid-state lasers (Cytex). sfGFP  
452 fluorescence was measured in the FL1 channel with a 510/20 nm emission filter, and  
453 mCherry fluorescence was measured in the FL3 channel with a 650 nm long-pass filter.  
454 Event rates of 1,000–3,500 events/s were used, and all events were captured until 20,000  
455 events occurred within an SSC-FSC area characteristic of the strain. Calibration beads  
456 (Spherotech, RCP30-5A) were measured at the end of each cytometry session. Flow  
457 cytometry files were processed using FlowCal<sup>70</sup>. A gate fraction of 0.3 was used to gate  
458 events in the SSC and FSC channels, and FL1/FL3 arbitrary fluorescence units were  
459 calibrated to MEFL/MECY using calibration bead data collected during each respective  
460 cytometry session (Supplementary Fig. 13).

461

#### 462 **Population mean and variance calculation**

463 Flow cytometry data for each sample was analyzed using a custom Python script that  
464 calculates arithmetic mean and noise from fluorescence distributions. The script first trims  
465 a small number of outlier observations which can heavily influence sample noise.  
466 Trimming is performed by first calculating a smooth estimation of the probability density  
467 function corresponding to the log-fluorescence distribution of the sample via kernel  
468 density estimation. The range of fluorescence values to keep is then determined by  
469 identifying the points nearest to the median at which the density estimate falls below a  
470 0.5% threshold. Sample histograms that display the trimming effect are generated and  
471 assessed to ensure the trimming functions as expected. Mean and variance of a likewise

472 analyzed, untransformed MG1655 sample are then subtracted from the mean and  
473 variance of experimental samples.

474

#### 475 **System performance analysis**

476 The concave hull of  $\log_{10}$  transformed mean-noise pointsets was used to calculate both  
477  $F_A$  and  $F_\eta$ . R packages “alphahull” and “sp” were used to find concave hulls and convert  
478 hulls to polygon objects, respectively. Alpha parameter was chosen manually. We report  
479  $\log_{10}(F_A)$  as the area of the polygon defined by the hull, and  $\log_{10}(F_\eta)$  as the length of the  
480 longest vertical chord spanning the hull.

481

#### 482 **Convolution distribution simulation and analysis**

483 Fluorescence events were randomly sampled ( $n=50,000$ ) from populations that received  
484 no AHL and summed with likewise sampled events from populations that received no  
485 aTc. To simulate the population which received neither AHL nor aTc, events were  
486 sampled from that population twice and then summed. The three highest and lowest  
487 fluorescence events were eliminated before summation to remove extreme outliers.

488

489 Experimental and simulated fluorescence distributions were converted to density  
490 estimates,  $p_e$  and  $p_s$ , respectively, to calculate Bhattacharyya coefficients:

491

$$492 \quad c_B = \int_0^\infty \sqrt{p_e(x_i)p_s(x_i)} dx \quad (5)$$

493

494 where  $x$  is FL1 fluorescence (MEFL).

495

496 Compensation of predicted mean and standard deviation was performed by subtracting  
497 the mean and variance of autofluorescence and basal sfGFP fluorescence from the  
498 uncompensated predicted mean and variance. Agreement between  $\log_{10}$ -scale  
499 experimental and simulated mean and standard deviation was measured by Lin's  
500 concordance correlation coefficient ( $\rho_c$ )<sup>71</sup>.

501

### 502 **Model for transcriptional output of a noisy regulator**

503 Mean transcriptional output from the P<sub>PhIF</sub> promoter was modeled using the Law of The  
504 Unconscious Statistician (LOTUS):

505

$$506 \quad \mu(c) = \int_0^{\infty} f(x)p_e(x)dx \quad (6)$$

507

508 where mean mCherry expression,  $\mu(c)$ , of a population is found through a single-cell  
509 relationship,  $f(x)$ , between FL1 and FL3 fluorescence (Supplementary Methods) and the  
510 experimental FL1 probability density estimate  $p_e(x)$ . Model predictions in FL1 and FL3  
511 were converted to sfGFP and mCherry by autofluorescence subtraction.

512

### 513 **Statistical analysis**

514 Points and density estimates throughout the text are single replicates collected over one  
515 to three separate experiments as indicated in figure legends. Standard errors on model  
516 fits are shown in the Supplementary Information.

517

518 **Code availability**

519 Custom code used in this study has been deposited on GitHub at  
520 <https://github.com/taborlab/NoiseControl>.

521

522 **Data availability**

523 Datasets generated during this study have been deposited on GitHub at  
524 <https://github.com/taborlab/NoiseControl>.

525

526 **References**

- 527 1. Swain, P. S., Elowitz, M. B. & Siggia, E. D. Intrinsic and extrinsic contributions to  
528 stochasticity in gene expression. *Proc. Natl. Acad. Sci. U.S.A.* **99**, 12795–12800  
529 (2002).
- 530 2. Cai, L., Friedman, N. & Xie, X. S. Stochastic protein expression in individual cells at  
531 the single molecule level. *Nature* **440**, 358–362 (2006).
- 532 3. McAdams, H. H. & Shapiro, L. A bacterial cell-cycle regulatory network operating in  
533 time and space. *Science (New York, N.Y.)* **301**, 1874–7 (2003).
- 534 4. Schmiedel, J. M., Carey, L. B. & Lehner, B. Empirical mean-noise fitness  
535 landscapes reveal the fitness impact of gene expression noise. *Nature*  
536 *Communications* **10**, 3180 (2019).
- 537 5. Wang, Z. & Zhang, J. Impact of gene expression noise on organismal fitness and  
538 the efficacy of natural selection. *PNAS* **108**, E67–E76 (2011).
- 539 6. Duvéau, F. *et al.* Fitness effects of altering gene expression noise in  
540 *Saccharomyces cerevisiae*. *eLife* **7**, e37272 (2018).



- 541 7. Keren, L. *et al.* Massively Parallel Interrogation of the Effects of Gene Expression  
542 Levels on Fitness. *Cell* **166**, 1282-1294.e18 (2016).
- 543 8. Batada, N. N. & Hurst, L. D. Evolution of chromosome organization driven by  
544 selection for reduced gene expression noise. *Nature Genetics* **39**, 945–949 (2007).
- 545 9. Raser, J. M. & O’Shea, E. K. Control of stochasticity in eukaryotic gene expression.  
546 *Science* **304**, 1811–1814 (2004).
- 547 10. Fraser, H. B., Hirsh, A. E., Giaever, G., Kumm, J. & Eisen, M. B. Noise Minimization  
548 in Eukaryotic Gene Expression. *PLoS Biol* **2**, (2004).
- 549 11. Ramsey, S. A. *et al.* Dual feedback loops in the GAL regulon suppress cellular  
550 heterogeneity in yeast. *Nat. Genet.* **38**, 1082–1087 (2006).
- 551 12. Ji, N. *et al.* Feedback control of gene expression variability in the *Caenorhabditis*  
552 *elegans* Wnt pathway. *Cell* **155**, 869–880 (2013).
- 553 13. Taniguchi, Y. *et al.* Quantifying *E. coli* Proteome and Transcriptome with Single-  
554 Molecule Sensitivity in Single Cells. *Science* **329**, 533–538 (2010).
- 555 14. Newman, J. R. S. *et al.* Single-cell proteomic analysis of *S. cerevisiae* reveals the  
556 architecture of biological noise. *Nature* **441**, 840–846 (2006).
- 557 15. Lehner, B. Selection to minimise noise in living systems and its implications for the  
558 evolution of gene expression. *Mol. Syst. Biol.* **4**, 170 (2008).
- 559 16. Barroso, G. V., Puzovic, N. & Dutheil, J. Y. The Evolution of Gene-Specific  
560 Transcriptional Noise Is Driven by Selection at the Pathway Level. *Genetics* **208**,  
561 173–189 (2018).
- 562 17. Balaban, N. Q., Merrin, J., Chait, R., Kowalik, L. & Leibler, S. Bacterial persistence  
563 as a phenotypic switch. *Science* **305**, 1622–1625 (2004).

- 564 18. Rotem, E. *et al.* Regulation of phenotypic variability by a threshold-based  
565 mechanism underlies bacterial persistence. *Proc. Natl. Acad. Sci. U.S.A.* **107**,  
566 12541–12546 (2010).
- 567 19. El Meouche, I., Siu, Y. & Dunlop, M. J. Stochastic expression of a multiple antibiotic  
568 resistance activator confers transient resistance in single cells. *Scientific Reports* **6**,  
569 19538 (2016).
- 570 20. Carey, J. N. *et al.* Regulated Stochasticity in a Bacterial Signaling Network Permits  
571 Tolerance to a Rapid Environmental Change. *Cell* **173**, 196–207.e14 (2018).
- 572 21. Balázsi, G., van Oudenaarden, A. & Collins, J. J. Cellular Decision-Making and  
573 Biological Noise: From Microbes to Mammals. *Cell* **144**, 910–925 (2011).
- 574 22. Chen, L., Wang, R., Zhou, T. & Aihara, K. Noise-induced cooperative behavior in a  
575 multicell system. *Bioinformatics* **21**, 2722–2729 (2005).
- 576 23. Ackermann, M. *et al.* Self-destructive cooperation mediated by phenotypic noise.  
577 *Nature* **454**, 987–990 (2008).
- 578 24. Elowitz, M. B., Levine, A. J., Siggia, E. D. & Swain, P. S. Stochastic gene  
579 expression in a single cell. *Science* **297**, 1183–1186 (2002).
- 580 25. Raser, J. M. & O’Shea, E. K. Noise in gene expression: origins, consequences, and  
581 control. *Science* **309**, 2010–2013 (2005).
- 582 26. Bar-Even, A. *et al.* Noise in protein expression scales with natural protein  
583 abundance. *Nature Genetics* **38**, 636–643 (2006).
- 584 27. Kim, K. H., Choi, K., Bartley, B. & Sauro, H. M. Controlling E. coli Gene Expression  
585 Noise. *IEEE Trans Biomed Circuits Syst* **9**, 497–504 (2015).

- 586 28. Hornung, G. *et al.* Noise–mean relationship in mutated promoters. *Genome Res.* **22**,  
587 2409–2417 (2012).
- 588 29. Blake, W. J. *et al.* Phenotypic consequences of promoter-mediated transcriptional  
589 noise. *Mol. Cell* **24**, 853–865 (2006).
- 590 30. Murphy, K. F., Adams, R. M., Wang, X., Balázsi, G. & Collins, J. J. Tuning and  
591 controlling gene expression noise in synthetic gene networks. *Nucleic Acids Res* **38**,  
592 2712–2726 (2010).
- 593 31. Becskei, A., Kaufmann, B. B. & van Oudenaarden, A. Contributions of low molecule  
594 number and chromosomal positioning to stochastic gene expression. *Nat. Genet.*  
595 **37**, 937–944 (2005).
- 596 32. Murphy, K. F., Balázsi, G. & Collins, J. J. Combinatorial promoter design for  
597 engineering noisy gene expression. *Proc Natl Acad Sci U S A* **104**, 12726–12731  
598 (2007).
- 599 33. Becskei, A. & Serrano, L. Engineering stability in gene networks by autoregulation.  
600 *Nature* **405**, 590–593 (2000).
- 601 34. Nevozhay, D., Adams, R. M., Murphy, K. F., Josic, K. & Balázsi, G. Negative  
602 autoregulation linearizes the dose-response and suppresses the heterogeneity of  
603 gene expression. *Proc. Natl. Acad. Sci. U.S.A.* **106**, 5123–5128 (2009).
- 604 35. To, T.-L. & Maheshri, N. Noise can induce bimodality in positive transcriptional  
605 feedback loops without bistability. *Science* **327**, 1142–1145 (2010).
- 606 36. Briat, C. & Khammash, M. Computer control of gene expression: Robust setpoint  
607 tracking of protein mean and variance using integral feedback. in *2012 IEEE 51st*

- 608 *IEEE Conference on Decision and Control (CDC)* 3582–3588 (2012).  
609 doi:10.1109/CDC.2012.6426720.
- 610 37. Zhuravel, D. *et al.* Phenotypic impact of regulatory noise in cellular stress-response  
611 pathways. *Syst Synth Biol* **4**, 105–116 (2010).
- 612 38. Blake, W. J., KAern, M., Cantor, C. R. & Collins, J. J. Noise in eukaryotic gene  
613 expression. *Nature* **422**, 633–637 (2003).
- 614 39. Aranda-Díaz, A., Mace, K., Zuleta, I., Harrigan, P. & El-Samad, H. Robust Synthetic  
615 Circuits for Two-Dimensional Control of Gene Expression in Yeast. *ACS Synth Biol*  
616 **6**, 545–554 (2017).
- 617 40. Bonny, A. R., Fonseca, J. P., Park, J. E. & El-Samad, H. Orthogonal control of mean  
618 and variability of endogenous genes in a human cell line. *Nature Communications*  
619 **12**, 292 (2021).
- 620 41. Hung, M. *et al.* Modulating the frequency and bias of stochastic switching to control  
621 phenotypic variation. *Nature Communications* **5**, 4574 (2014).
- 622 42. Mundt, M., Anders, A., Murray, S. M. & Sourjik, V. A System for Gene Expression  
623 Noise Control in Yeast. *ACS Synth. Biol.* **7**, 2618–2626 (2018).
- 624 43. Benzinger, D. & Khammash, M. Pulsatile inputs achieve tunable attenuation of gene  
625 expression variability and graded multi-gene regulation. *Nat Commun* **9**, 3521  
626 (2018).
- 627 44. Louis, M. & Becskei, A. Binary and graded responses in gene networks. *Sci. STKE*  
628 **2002**, pe33 (2002).

- 629 45. Hooshangi, S., Thiberge, S. & Weiss, R. Ultrasensitivity and noise propagation in a  
630 synthetic transcriptional cascade. *Proc. Natl. Acad. Sci. U.S.A.* **102**, 3581–3586  
631 (2005).
- 632 46. Rossi, N. A. & Dunlop, M. J. Customized Regulation of Diverse Stress Response  
633 Genes by the Multiple Antibiotic Resistance Activator MarA. *PLoS Comput. Biol.* **13**,  
634 e1005310 (2017).
- 635 47. Lutz, R. & Bujard, H. Independent and tight regulation of transcriptional units in  
636 *Escherichia coli* via the LacR/O, the TetR/O and AraC/I1-I2 regulatory elements.  
637 *Nucleic Acids Res* **25**, 1203–1210 (1997).
- 638 48. Wong Ng, J., Chatenay, D., Robert, J. & Poirier, M. G. Plasmid copy number noise  
639 in monoclonal populations of bacteria. *Phys. Rev. E* **81**, 011909 (2010).
- 640 49. Bhattacharyya, A. On a Measure of Divergence between Two Multinomial  
641 Populations. *Sankhyā: The Indian Journal of Statistics (1933-1960)* **7**, 401–406  
642 (1946).
- 643 50. Meyer, A. J., Segall-Shapiro, T. H., Glassey, E., Zhang, J. & Voigt, C. A. *Escherichia*  
644 *coli* ‘Marionette’ strains with 12 highly optimized small-molecule sensors. *Nat.*  
645 *Chem. Biol.* **15**, 196–204 (2019).
- 646 51. Schmidl, S. R., Sheth, R. U., Wu, A. & Tabor, J. J. Refactoring and optimization of  
647 light-switchable *Escherichia coli* two-component systems. *ACS synthetic biology* **3**,  
648 820–31 (2014).
- 649 52. Anderson, J. C., Voigt, C. A. & Arkin, A. P. Environmental signal integration by a  
650 modular AND gate. *Mol Syst Biol* **3**, (2007).

- 651 53. Yokobayashi, Y., Weiss, R. & Arnold, F. H. Directed evolution of a genetic circuit.  
652 *Proc. Natl. Acad. Sci. U.S.A.* **99**, 16587–16591 (2002).
- 653 54. Egbert, R. G. & Klavins, E. Fine-tuning gene networks using simple sequence  
654 repeats. *PNAS* **109**, 16817–16822 (2012).
- 655 55. Lehner, B. Conflict between Noise and Plasticity in Yeast. *PLOS Genetics* **6**,  
656 e1001185 (2010).
- 657 56. Chapal, M., Mintzer, S., Brodsky, S., Carmi, M. & Barkai, N. Resolving noise–control  
658 conflict by gene duplication. *PLOS Biology* **17**, e3000289 (2019).
- 659 57. Mutalik, V. K. *et al.* Precise and reliable gene expression via standard transcription  
660 and translation initiation elements. *Nat. Methods* **10**, 354–360 (2013).
- 661 58. Engler, C. *et al.* A Golden Gate Modular Cloning Toolbox for Plants. *ACS Synth.*  
662 *Biol.* **3**, 839–843 (2014).
- 663 59. Fonseca, J. P. *et al.* A Toolkit for Rapid Modular Construction of Biological Circuits  
664 in Mammalian Cells. *ACS Synth. Biol.* **8**, 2593–2606 (2019).
- 665 60. Lee, M. E., DeLoache, W. C., Cervantes, B. & Dueber, J. E. A Highly Characterized  
666 Yeast Toolkit for Modular, Multipart Assembly. *ACS Synth. Biol.* **4**, 975–986 (2015).
- 667 61. Moore, S. J. *et al.* EcoFlex: A Multifunctional MoClo Kit for E. coli Synthetic Biology.  
668 *ACS Synth. Biol.* **5**, 1059–1069 (2016).
- 669 62. Tschirhart, T. *et al.* Synthetic Biology Tools for the Fast-Growing Marine Bacterium  
670 *Vibrio natriegens*. *ACS Synth. Biol.* **8**, 2069–2079 (2019).
- 671 63. Guiziou, S. *et al.* A part toolbox to tune genetic expression in *Bacillus subtilis*.  
672 *Nucleic Acids Res* **44**, 7495–7508 (2016).

- 673 64. Meouche, I. E. & Dunlop, M. J. Heterogeneity in efflux pump expression predisposes  
674 antibiotic-resistant cells to mutation. *Science* **362**, 686–690 (2018).
- 675 65. Turcotte, M., Garcia-Ojalvo, J. & Süel, G. M. A genetic timer through noise-induced  
676 stabilization of an unstable state. *PNAS* **105**, 15732–15737 (2008).
- 677 66. Aronson, M. S., Ricci-Tam, C., Zhu, X. & Sgro, A. E. Exploiting noise to engineer  
678 adaptability in synthetic multicellular systems. *Current Opinion in Biomedical*  
679 *Engineering* **16**, 52–60 (2020).
- 680 67. Karig, D. *et al.* Stochastic Turing patterns in a synthetic bacterial population. *PNAS*  
681 **115**, 6572–6577 (2018).
- 682 68. Egbert, R., Brettner, L., Zong, D. & Klavins, E. Self-destructive altruism in a  
683 synthetic developmental program enables complex feedstock utilization. *bioRxiv*  
684 086900 (2017) doi:10.1101/086900.
- 685 69. Engler, C., Kandzia, R. & Marillonnet, S. A one pot, one step, precision cloning  
686 method with high throughput capability. *PloS one* **3**, e3647 (2008).
- 687 70. Castillo-Hair, S. M. *et al.* FlowCal: A user-friendly, open source software tool for  
688 automatically converting flow cytometry data from arbitrary to calibrated units. *ACS*  
689 *synthetic biology* (2016) doi:10.1021/acssynbio.5b00284.
- 690 71. Lin, L. I.-K. A Concordance Correlation Coefficient to Evaluate Reproducibility.  
691 *Biometrics* **45**, 255–268 (1989).

692

## 693 **Acknowledgments**

694 We thank Dr. Joel Moake for the use of his flow cytometer. This material is based upon  
695 work supported by the National Science Foundation under Grant No. CAREER 1553317

696 (PI: JJT), the Office of Naval Research under Grant No. N00014-18-1-2611 (PI: JJT), the  
697 Welch Foundation under Grant No. C-1856 (PI: JJT), the National Science Foundation  
698 under grant No. MCB-1616755 (PI: OAI), and the Welch Foundation under grant No. C-  
699 1995 (PI: OAI).

700

### 701 **Author Contributions**

702 K.P.G. and J.J.T. conceived of the project. J.J.T. and O.A.I. supervised the project. K.P.G.  
703 designed and constructed plasmids, performed experiments, and analyzed data. E.J.O.  
704 developed and wrote the code for calculation of sample mean and noise. S.D.R.  
705 developed and analyzed kinetic models of IPs. K.P.G. and E.J.O. developed the  
706 phenomenological model for IP mean and noise. K.P.G. developed and conducted  
707 performance analysis and convolution simulation technique. K.P.G., S.D.R., O.A.I., and  
708 J.J.T. wrote the manuscript.

709

### 710 **Competing Financial Interests**

711 The authors declare no competing financial interests.



712 **Figures**

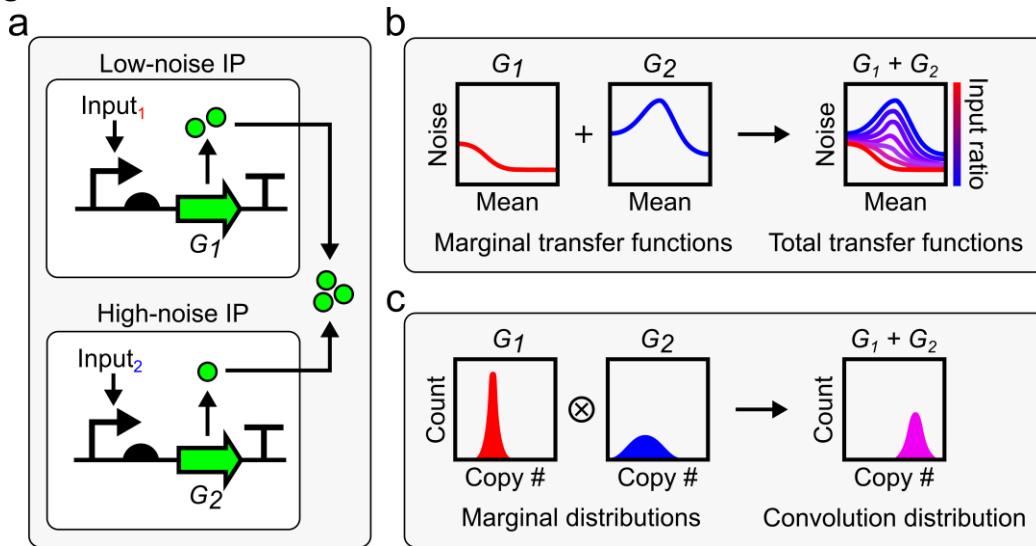

713  
714

715 **Fig. 1. Summation of gene expression from low and high noise IPs.** (a) Two copies  
716 ( $G_1$  and  $G_2$ ) of the same gene are expressed from two independently regulated IPs: one  
717 that produces low noise distributions and one that produces high noise distributions.  $G_1$   
718 and  $G_2$  sum inside cells. (b) Mean and noise of  $G_1$  and  $G_2$ , separately, are functions of  
719 their respective IP's inputs (marginal transfer functions) and have single mean-noise  
720 trajectories. Mean and noise of the sum of  $G_1$  and  $G_2$  is a function of the amount and ratio  
721 of both IP's inputs (total transfer functions) and can be tuned within the area defined by  
722 their marginal transfer functions. (c) When  $G_1$  and  $G_2$  are summed, their marginal  
723 distributions form a convolution ( $\otimes$ ).  
724

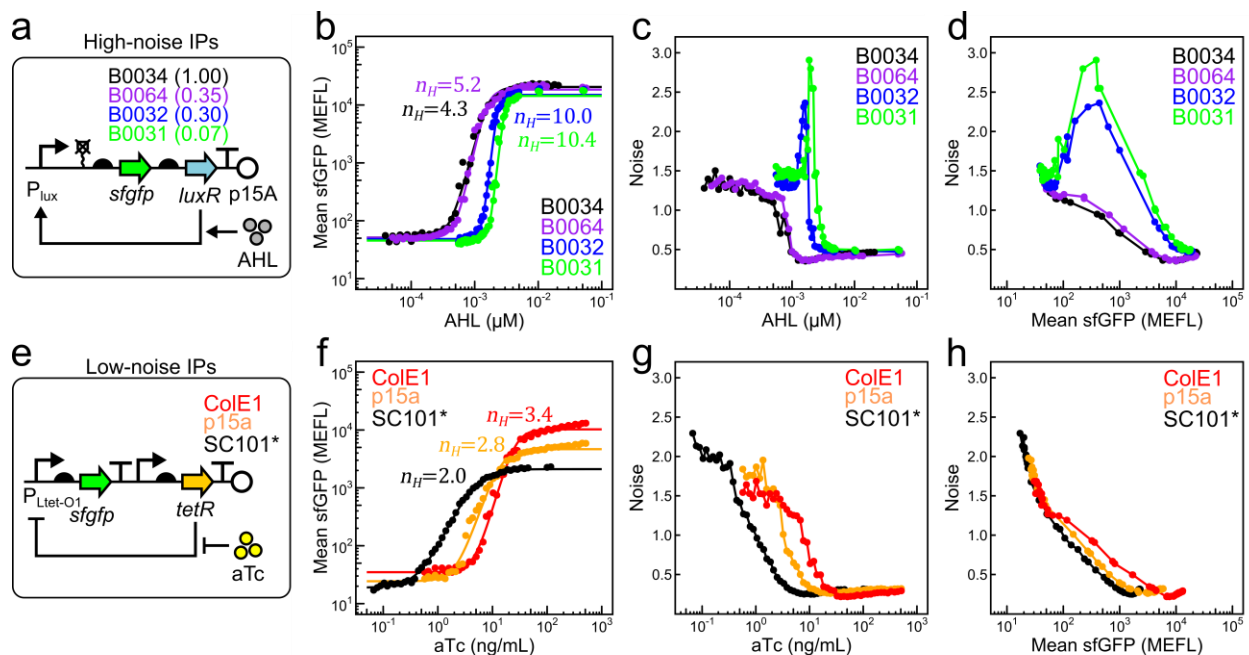

725  
726 **Fig. 2. Engineering low and high noise IPs controlled by AHL and aTc.** (a) Library of  
727 high noise IPs based on LuxR:AHM-mediated positive transcriptional feedback. *LuxR* is  
728 encoded under RBSs of variable strength (indicated above the RBS) in different library  
729 members. Steady-state AHL-mean (b), AHL-noise (c), and mean-noise (d) transfer  
730 functions for high noise IP variants from (a). (e) Library of low noise IPs based on  
731 TetR:aTc-inducible gene expression without feedback. Different plasmid origins on which  
732 this IP is introduced are indicated. Steady-state aTc-mean (f), aTc-noise (g), and mean-  
733 noise (h) transfer functions for origin of replication variants from (e). Points within each  
734 group are single replicates collected from two separate experiments performed on two  
735 separate days. Smooth lines in (b) and (f) are fits to Hill functions with Hill coefficients  
736 ( $n_H$ ) indicated.

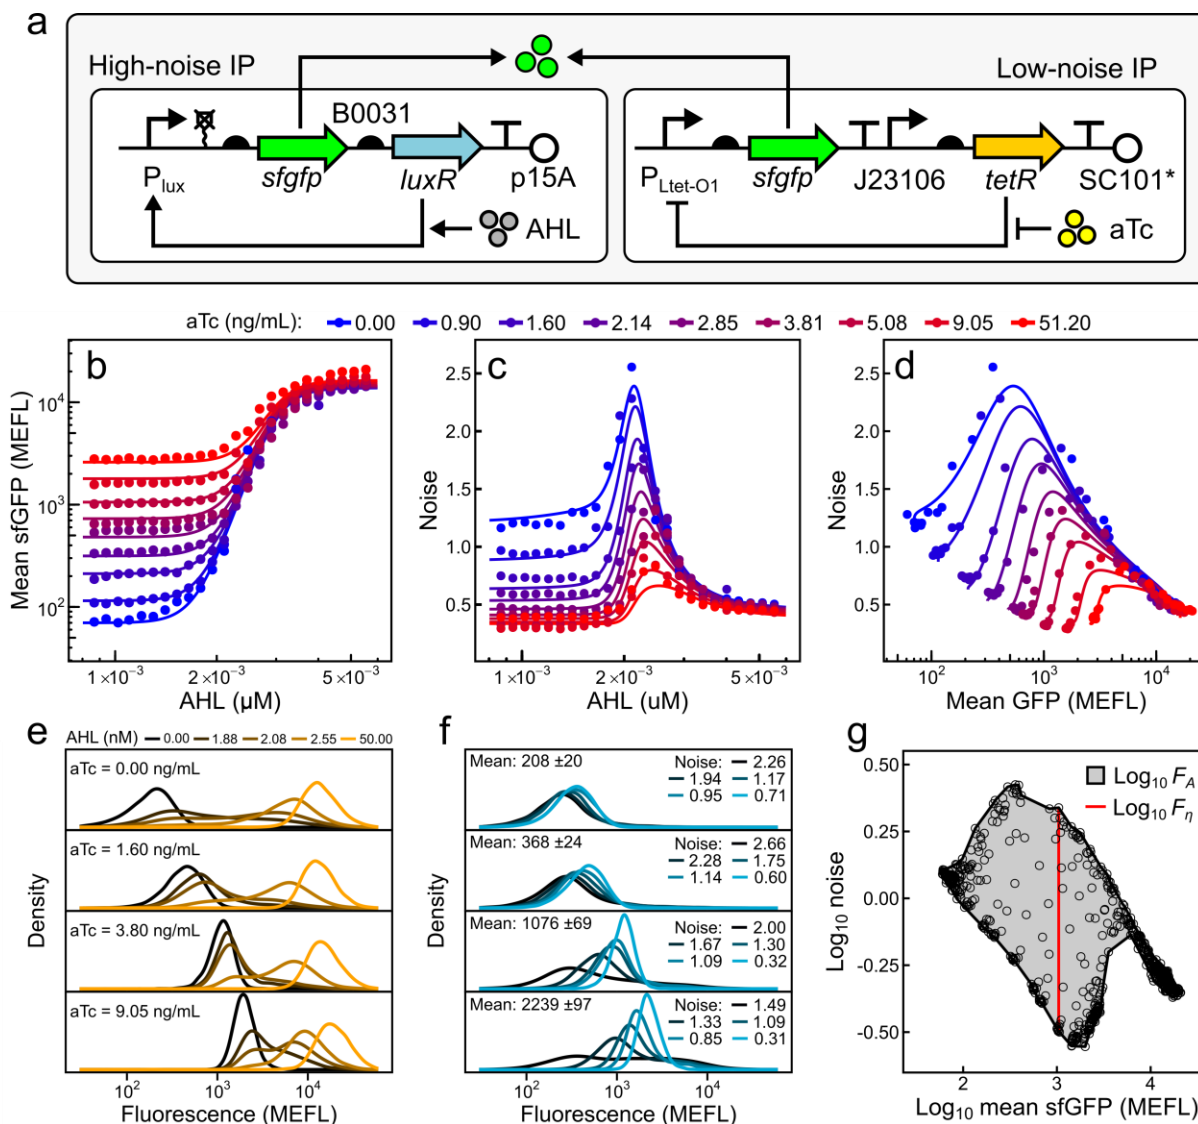

737  
 738 **Fig. 3. Independent control of mean and noise by summation of gene expression**  
 739 **from IP<sub>h</sub>/IP<sub>l</sub>.** (a) Plasmids encoding IP<sub>h</sub> and IP<sub>l</sub> are co-transformed in MG1655 and  
 740 induced with AHL and aTc, respectively. sfGFP from each IP sum inside cells. Steady-  
 741 state AHL-mean (b), AHL-noise (c), and mean-noise (d) transfer functions of cells  
 742 harboring plasmids in (a) with exposure to combinations of AHL and aTc. Mean and noise  
 743 values (points) and model fits (lines) shown are a subset (9 out of 25 aTc concentrations)  
 744 selected for evenly spaced visualization. Selected fluorescence density estimates of cell  
 745 populations induced with AHL and aTc (e) over a wide range of inducer concentrations,  
 746 or (f) to a wide range of noise at virtually the same mean. (g) Concave hull (black line) of  
 747 the complete mean-noise pointset (circles) used to calculate dynamic area and dynamic  
 748 noise. Points and density estimates are single replicates collected from three separate  
 749 experiments performed on three separate days.

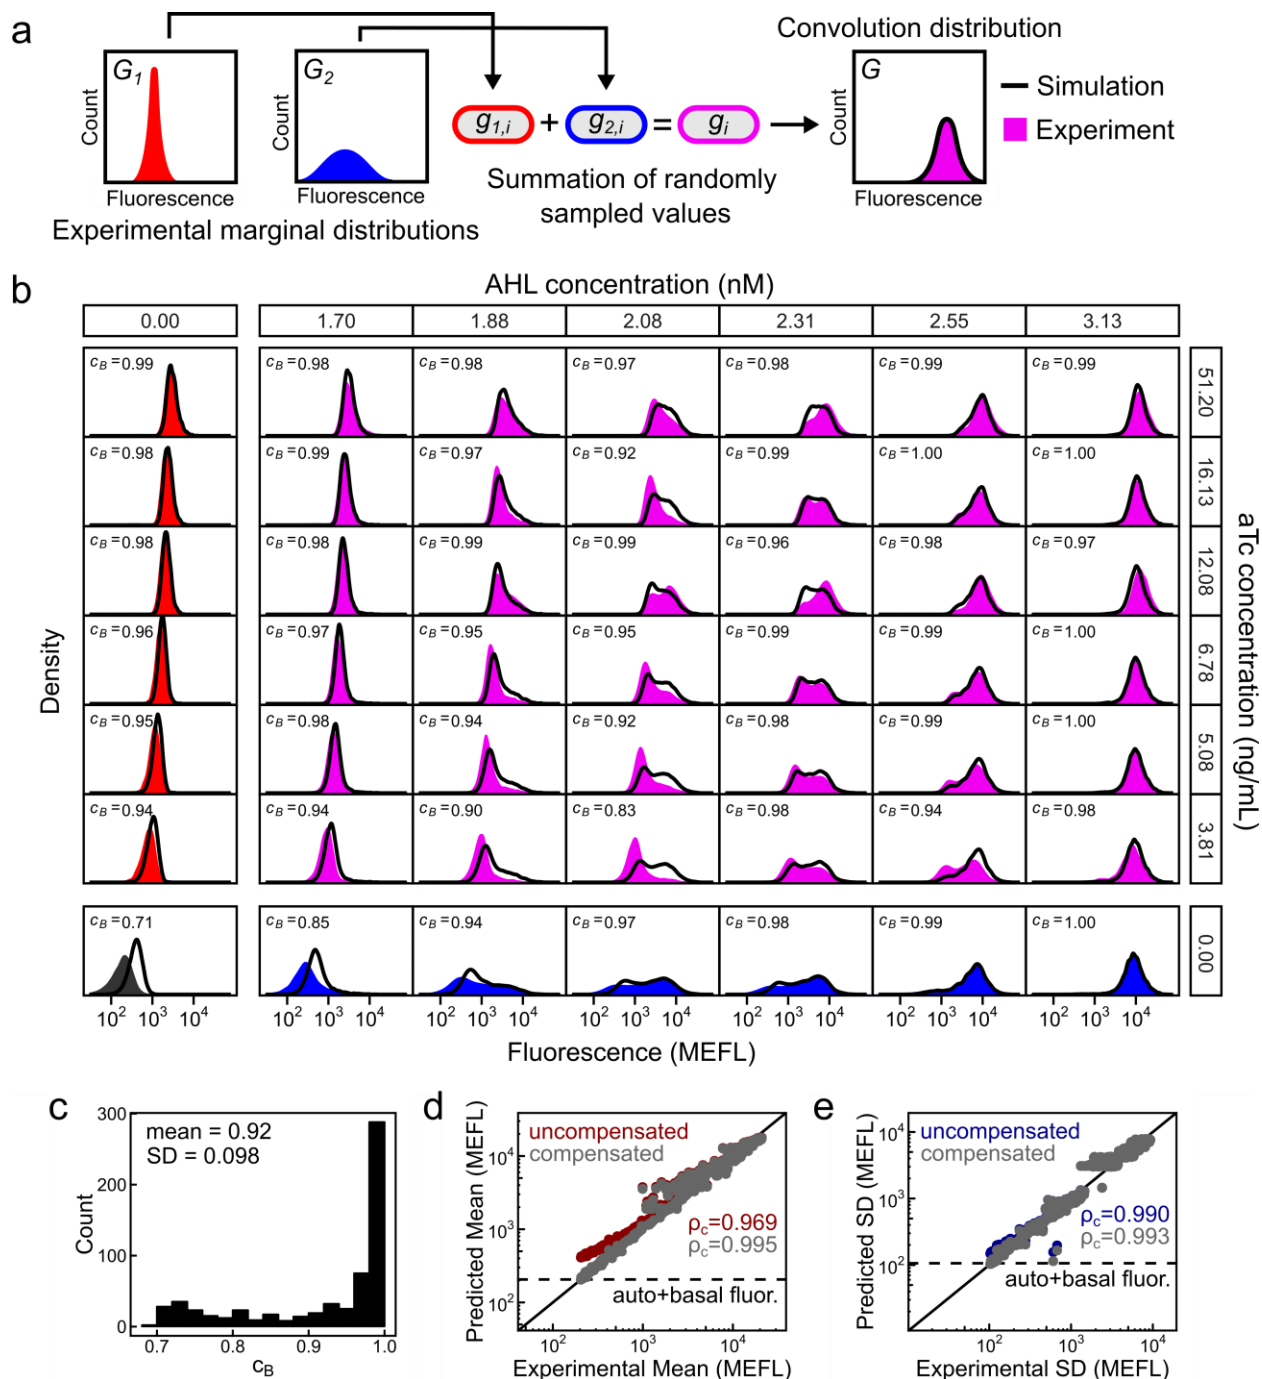

750  
 751 **Fig. 4. Convolution predicts gene expression distributions from  $IP_M/IP_I$ .** (a) Workflow  
 752 for simulating convolution distributions. Fluorescence events from two experimental  
 753 marginal distributions are randomly sampled and summed together. Summed events form  
 754 a simulated convolution distribution which can be compared with an experimental  
 755 counterpart. (b) Experimental (filled histograms) and simulated (black lines) fluorescence  
 756 distributions of cell populations induced with combinations of AHL (vertically aligned, 7 of  
 757 25 shown) and aTc (horizontally aligned, 7 of 25 shown). Simulations were performed  
 758 using populations with no AHL induction (first column) and no aTc induction (bottom row)  
 759 as marginal distributions. Bhattacharyya coefficients ( $c_B$ ) for each experimental-simulated

760 distribution pair is listed in each subpanel. **(c)** Distribution of  $c_B$  for all 625 pairs of  
761 experimental and simulated distributions. **(d,e)** Comparison of mean and standard  
762 deviation of experimental and simulated distributions. Equivalence line (black line) and  
763 Lin's concordance coefficients  $\rho_c$  are shown. Uncompensated predicted values measure  
764 autofluorescence and basal sfGFP fluorescence (dashed line) twice due to the  
765 summation in **(a)**. Compensation is described in the **Methods**. Experimental density  
766 estimates are single replicates collected from three separate experiments performed on  
767 three separate days.

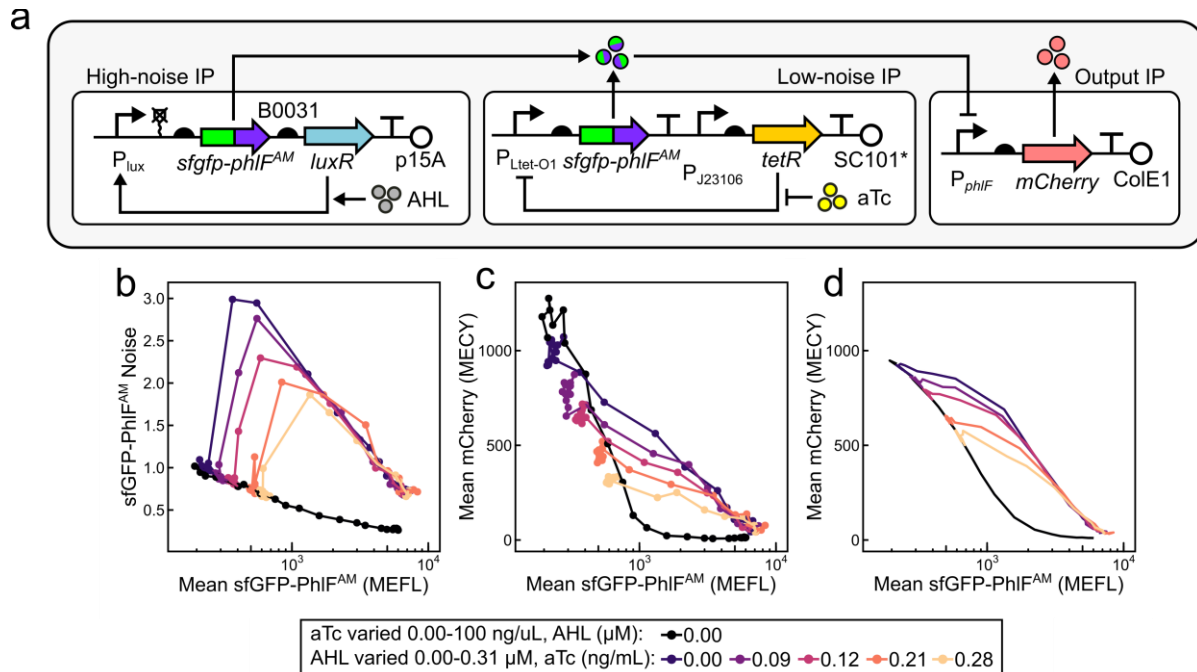

768  
769  
770  
771  
772  
773  
774  
775  
776  
777

**Fig. 5. Noise modulates repressor activity on a target promoter.** (a) Schematic representation of plasmids used to control noise of a transcriptional regulator and monitor its output. PhIF<sup>AM</sup> is fused to the C-terminus of sfGFP and expressed from IP<sub>i</sub> and IP<sub>h</sub>. PhIF<sup>AM</sup> activity is monitored via mCherry expression from the P<sub>phIF</sub> promoter on the output IP. (b) Steady-state sfGFP-PhIF<sup>AM</sup> mean-noise transfer functions of cells harboring plasmids in (a) with exposure to combinations of AHL and aTc. (c) Mean mCherry expression as a function of mean sfGFP-PhIF<sup>AM</sup>. (d) LOTUS model prediction of mean mCherry as a function of sfGFP-PhIF<sup>AM</sup>. Points represent single replicates collected on a single day.
